# Supplementary material for: Complexation-assisted regulatory mechanism of Cu(II)/H2O2 process for tetracycline degradation: Insights into microscale interactions and macroscale oxidation kinetics
Source: Research Square preprint supplement (doi:10.21203/rs.3.rs-8458554/v1), 2026-02-12
Supplement: Supplementary file 1 [file 0977721abc16a2dce24c3c02.docx]

**Supporting Information for**

**Complexation-assisted regulatory mechanism of Cu(II)/H2O2 process for tetracycline degradation: Insights into microscale interactions and macroscale oxidation kinetics**

Bo Yang1,2,*****, Xiaoyan Geng 1,2, Kaiyue Zhu3, Tao Gui 1,2, Wenlai Xu1,2, Weike Zhao2,3,*, Yang Shi4, Peng Zhou4

1 State Key Laboratory of Geohazard Prevention and Geoenvironment Protection, Chengdu University of Technology, Chengdu, 610059, China

2 State Environmental Protection Key Laboratory of Synergetic Control and Joint Remediation for Soil & Water Pollution, Chengdu University of Technology, Chengdu, 610059, China

3 School of Architecture and Civil Engineering, Xihua University, Chengdu 610039, China

4 State Key Laboratory of Hydraulics and Mountain River Engineering, College of Architecture and Environment, Sichuan University, Chengdu 610065, China

*⁎ Corresponding author.*

*E-mail address:* [*yangboscu@126.com*](mailto:yangboscu@126.com) *and* [*coco1730900@163.com*](mailto:coco1730900@163.com)

**Number of pages: 21**

**Number of texts: 4**

**Number of table: 1**

**Number of figures: 9**

**Text S1. Chemicals and reagents.**

Tetracycline (TET, 99%), chlorotetracycline (CTC, 99%), oxytetracycline (OTC, 99%), minocycline (MC, 99%) and coumarin were supplied by TCI (Shanghai) Development Co., Ltd. 2,2,6,6-Tetramethylpiperidine (TEMP, 99%), and 5,5-dimethylpyrroline-oxide (DMPO, 99%) were purchased from Sigma-Aldrich Chemical Co., Ltd. Cupric sulfate (CuSO4 , 99%), zinc sulfate monohydrate (ZnSO4·H2O,  98%), cobalt sulfate heptahydrate (CoSO4·7H2O, 99%), chromium sulfate hydrate (Cr2(SO4)3·xH2O, 98%), nickel sulfate hexahydrate (NiSO4·6H2O, 99%), manganese sulfate monohydrate (MnSO4•H2O, 99%), ethylenediaminetetraacetic acid (EDTA, 99%), nitro blue tetrazolium chloride (NBT, 98%), and tert-butyl alcohol (TBA, ≥99.5%) were obtained from Aladdin Industrial Corporation. Sodium nitrate (NaNO3, 99%), sodium chloride (NaCl, 99.5%), sodium hydrogen carbonate (NaHCO3, 99%), acetate acid and nitric acid (HNO3, 65%), and sodium hydroxide (NaOH, 99%) were purchased from Kelong Chemical Co. Ltd (Chengdu, China). All solutions were prepared by directly adding chemicals into the double deionized (DDI, 18.2 MΩ·cm) water produced from a Millipore Reverse Osmosis (RO) system.

**Text S2.** The determination of H2O2 concentrations

The concentration of H2O2 was determined by a UV-vis spectrometer (Mapada UV-1800) to measure the absorbance of stable orange complex at λ = 400 nm, which formed by chelating H2O2 with potassium titanate oxalate under acidic condition. After preparing potassium titanate oxalate stock solution (50 mM) and acetic acid-sodium acetate buffer solution (0.1 mM), the filtered sample (2.5 mL) was added into 1mL acetic acid-sodium acetate buffer solution and 1.5 mL potassium titanate oxalate solution. As a result, the concentration of H2O2 was detected by a UV-vis spectrometer after reacting for 20 min.

**Text S3.** The method of Cu(I) concentration detection

The concentration of Cu(I) was determined using a UV-vis spectrometer (Mapada UV-1800). Firstly, 10 mM neocuproine hemihydrate stock solutions was prepared. Then, samples (5 mL) were withdrawn from the reaction solution, and then the 2 mL filtered sample was added into the mixed solution containing, 0.2 mL Neocuproine hemihydrate and 2.8 mL water. The concentration of Cu(I) was detected by a UV-vis spectrometer at λ = 454 nm.

**Text S4.** Determination of Cu(III).

The peroxynitrite complexation strategy was used for Cu(III) detection. To achieve this, a mixture of 0.5 mL of NaIO4 (10 mmol L-1) and 1 mL of acetic acid-sodium acetate buffer (10 mmol L-1) was prepped. During the oxidation process, 1 mL of the reaction solution was added and immediately transferred to a quartz cuvette to measure the absorption strength at the range of 200-600 cm-1 via UV-vis spectrometer.

**Table S1** Sign of each cross-peak in the synchronous and asynchronous maps from 2D-COS

|  | **1680-1580** | **1480-1360** | **1250-1150** | **1100-1000** |
| --- | --- | --- | --- | --- |
| 1680-1580 | 0 | +(-) | +(-) | +(-) |
| 1480-1360 |  | 0 | +(-) | +(+) |
| 1250-1150 |  |  | 0 | +(+) |
| 1100-1000 |  |  |  | 0 |


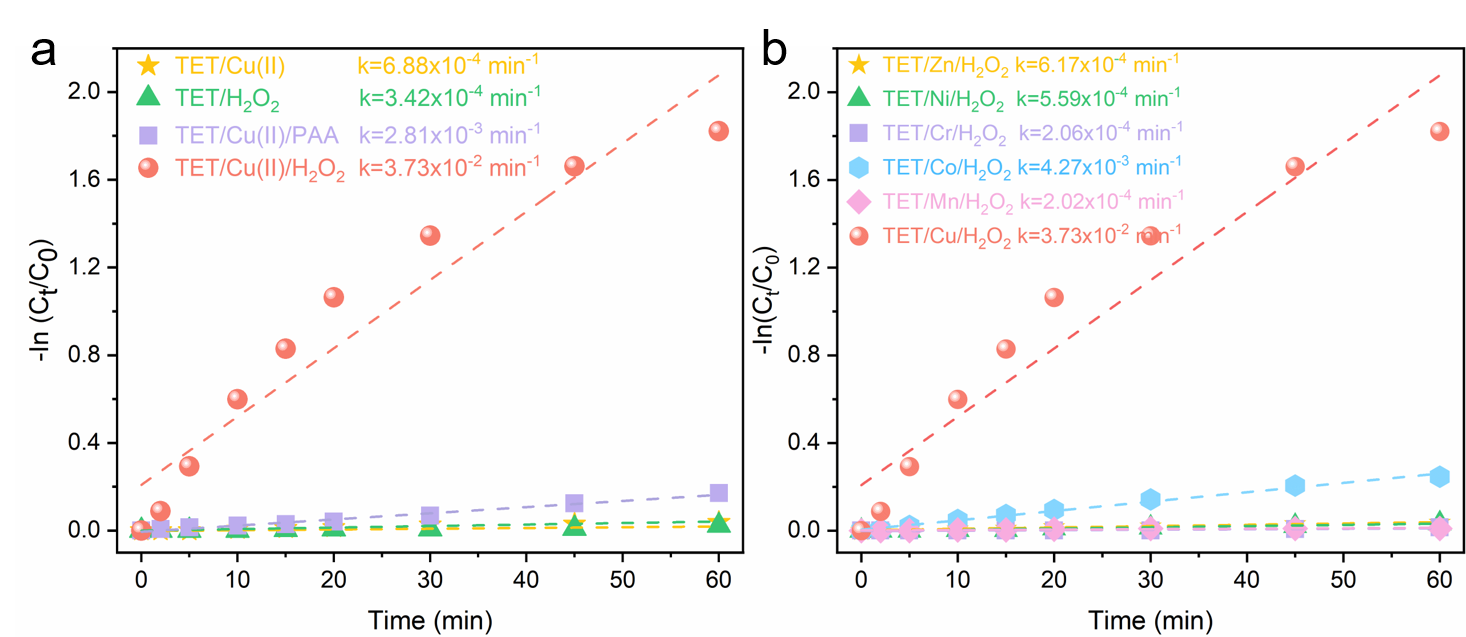


**Fig. S1** (a) The degradation reaction rate (kobs) of tetracycline in the Cu(II), H2O2, Cu(II)/PAA and Cu(II)/H2O2 processes; (b) kobs of tetracycline in various transition metals/H2O2 processes. ([TET] = 5 µM, [Cu(II)] =[Cr(III)] =[Mn(II)] =[Zn(II)] =[Co(II)] = [Ni(II)] =0.25 mM, [H2O2] = 2 mM, initial pH =5.5)





**Fig. S2** UV–vis spectra of TET and TET + various metal ions solutions. ([TET] = 5 µM, [Cu(II)] =[Cr(III)] =[Mn(II)] =[Zn(II)] =[Co(II)] = [Ni(II)] =0.2 mM)


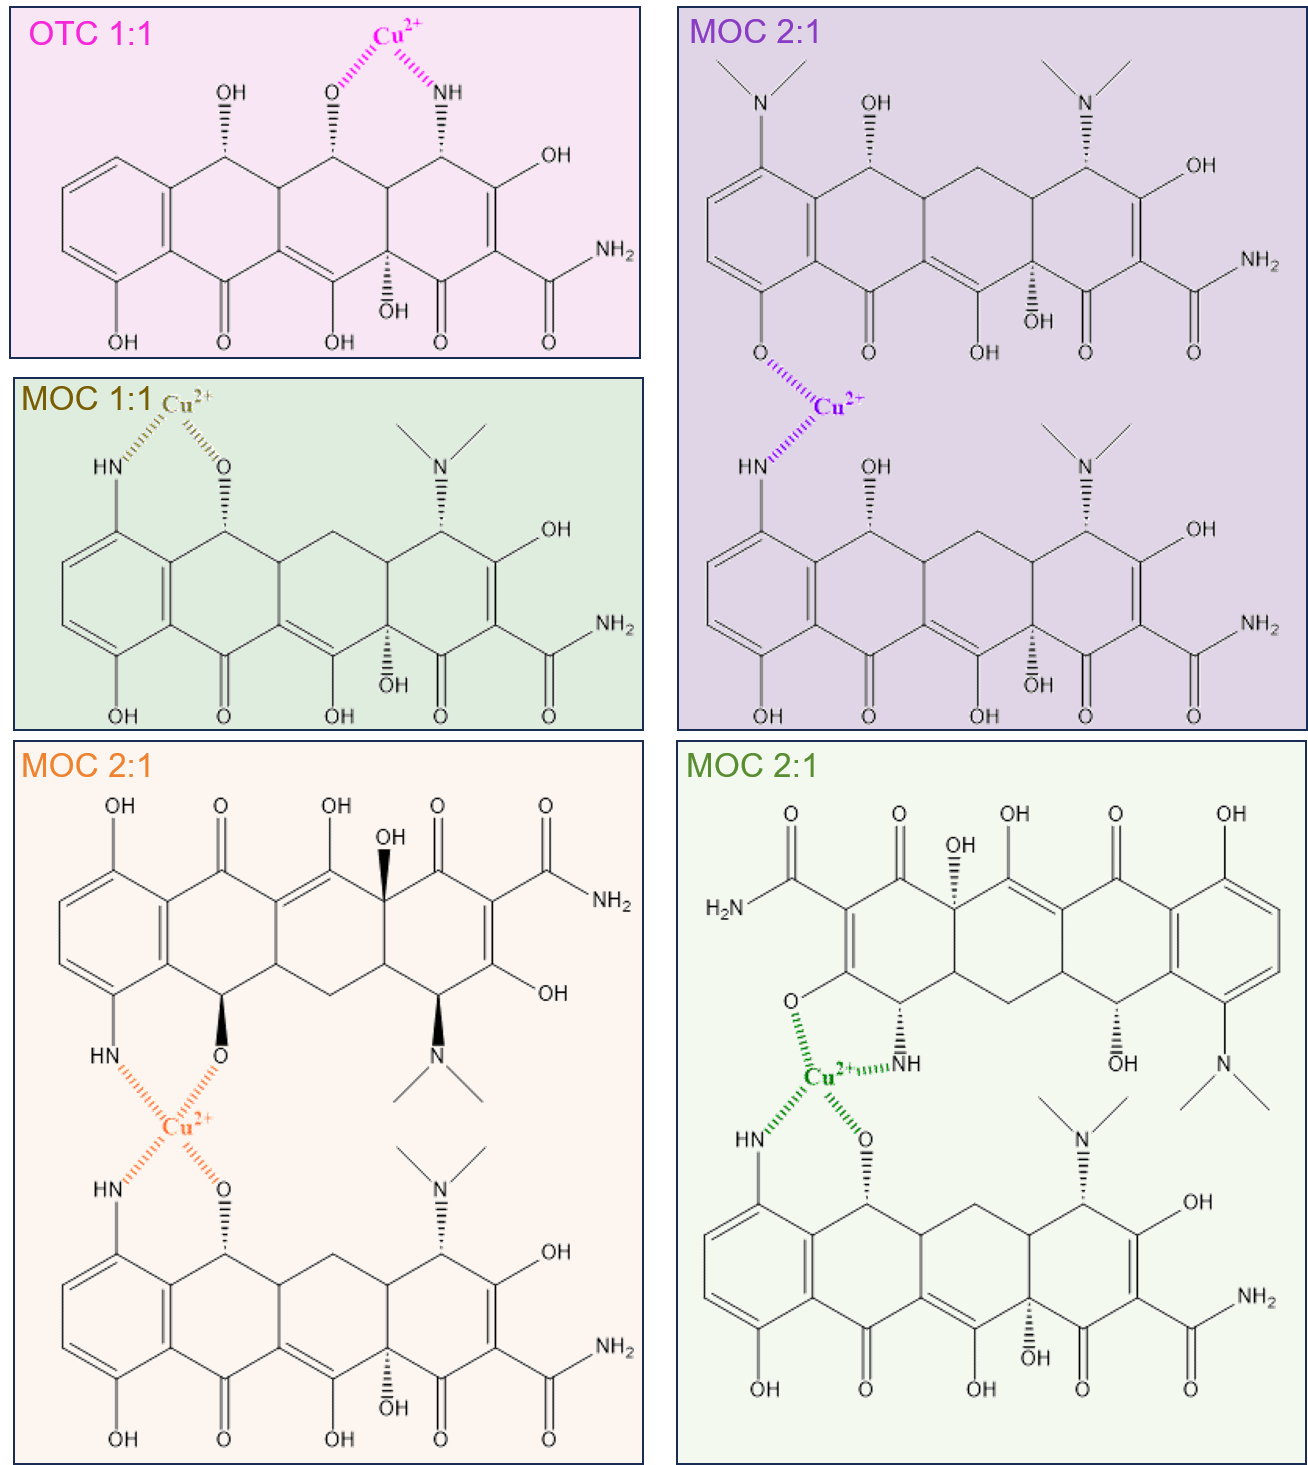


**Fig. S3** The proposed binding sites and ratios of tetracycline, minocycline with Cu(II)


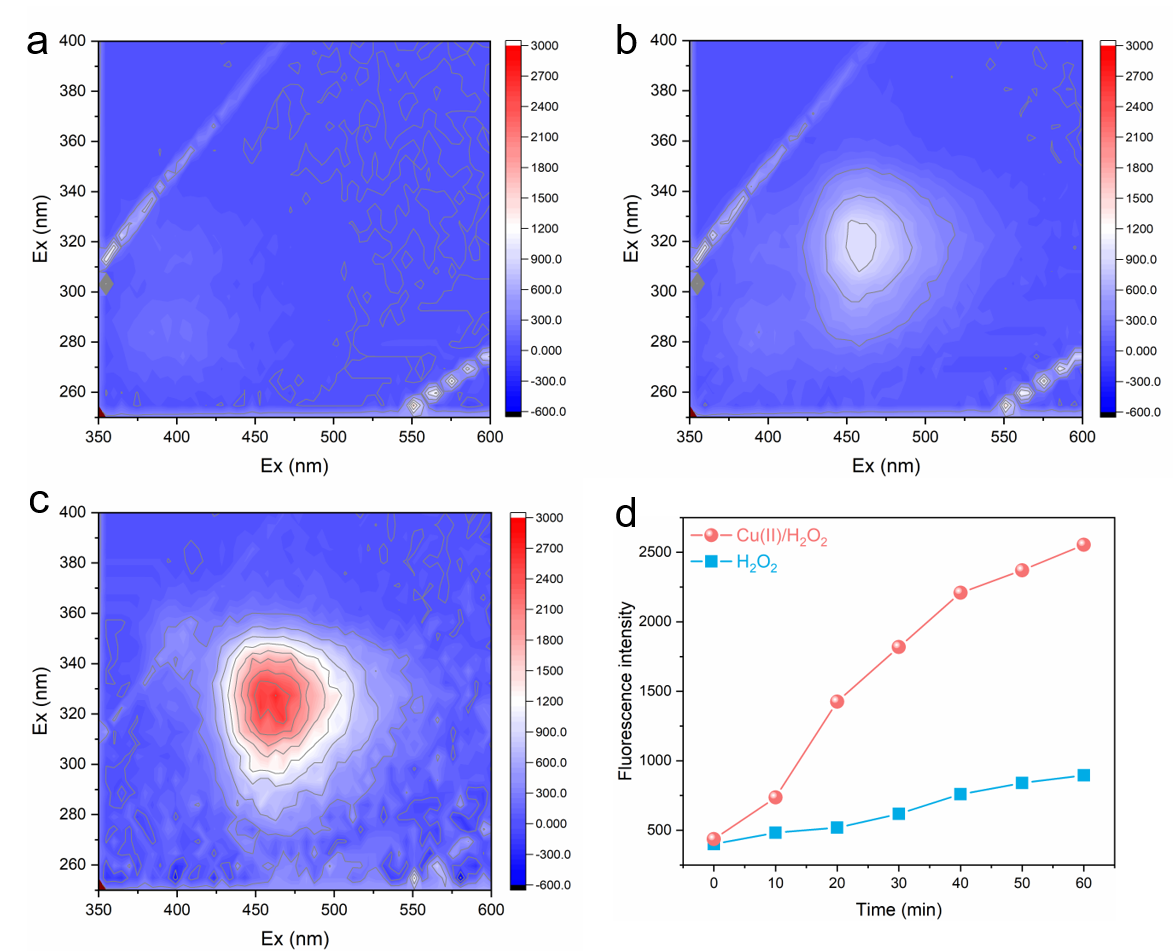


**Fig. S4** EEM spectrum of (a) 0.1 mM original coumarin, and 7-hydroxycoumarin generated by the reaction of coumarin and ⋅OH within 60 min in H2O2 process (b) and Cu(II)/H2O2 process; (e) Fluorescence intensity change of 7-hydroxycoumarin generated by the reaction of coumarin and ⋅OH. ([coumarin] = 0.1 mM, [Cu(II)] =0.25 mM, [H2O2] = 2 mM, initial pH =5.5)





**Fig. S5** Monitoring the formation of Cu(III) through ultraviolet-visible spectroscopy in Cu(II)/H2O2. ([Cu(II)] = 0.25 mM, [H2O2] = 2 mM, [NaIO4] = 2 mM, initial pH =5.5)





**Fig. S6** Singlet oxygen identification by EPR detection in different processes. ([TET] = 5 µM, [Cu(II)] = 0.25 mM, [H2O2] = 2 mM, [TEMP] = 5 mM, initial pH =5.5)


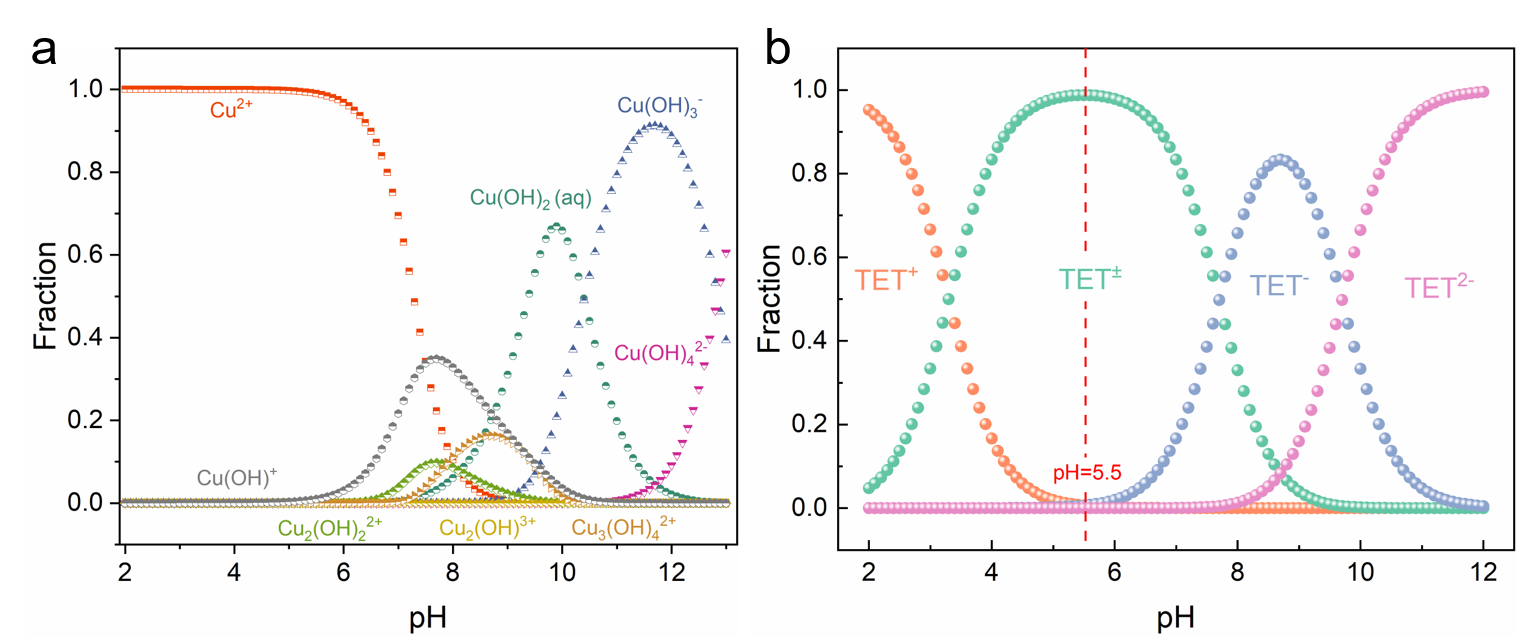


**Fig. S7** The species distribution of (a) Cu(II) and (b) TET at different pH values


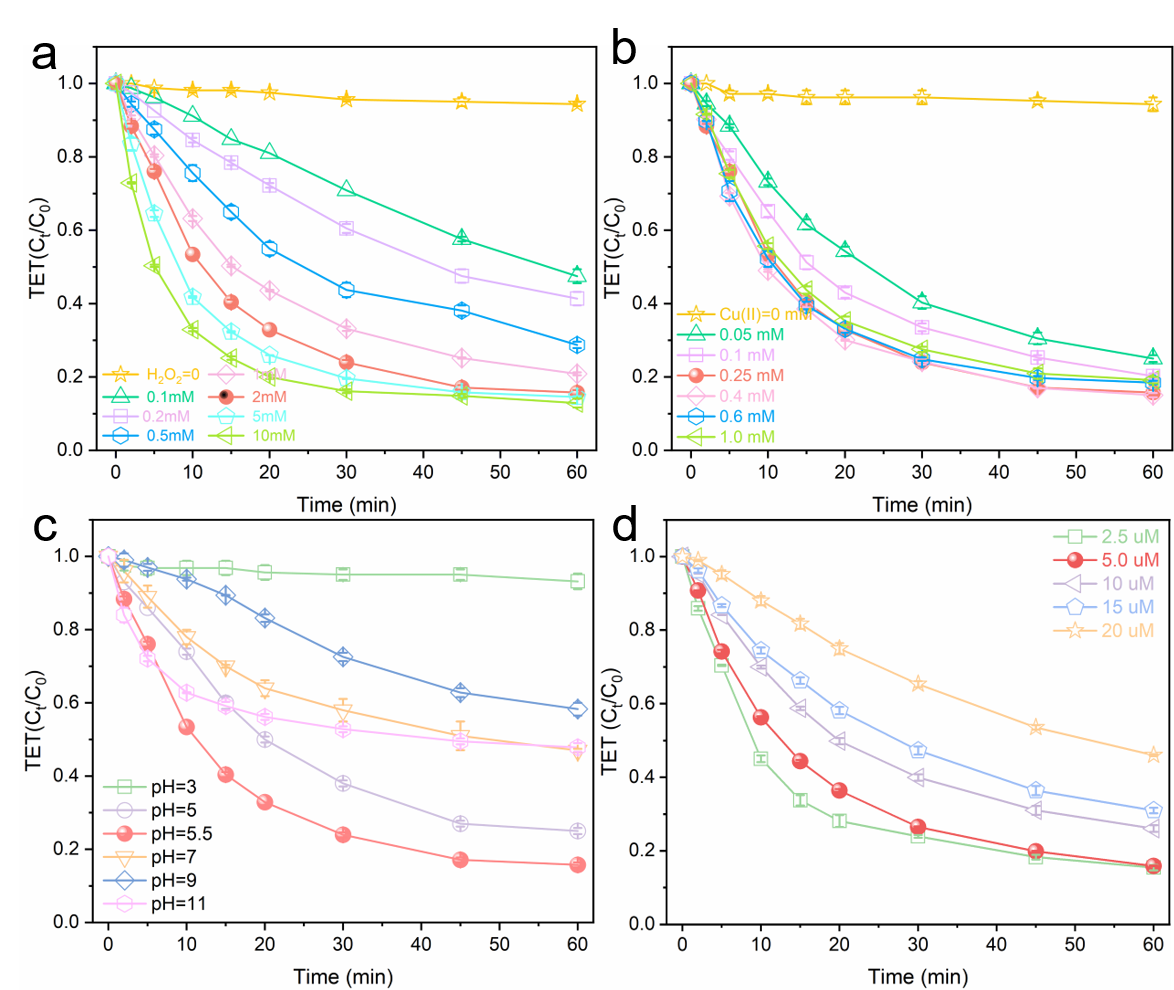


**Fig. S8** Effect of H2O2 concentration, Cu(II) concentration, initial pH and TET concentration on the degradation of TET by the Cu(II)/H2O2 process. ([TET] = 2.5-20 µM, [Cu(II)] =0.05-1.0 mM, [H2O2] = 0.1-10 mM, initial pH =3-11)





**Fig. S9** Linear relationship by plotting 1/[TET] versus 1/ΔAbs at pH 5.5.

**References**

(1) Lee, H.; Lee, H. J.; Sedlak, D. L.; Lee, C. pH-Dependent reactivity of oxidants formed by iron and copper-catalyzed decomposition of hydrogen peroxide. *CHEMOSPHERE* **2013**, *92* (6), 652-658. DOI: 10.1016/j.chemosphere.2013.01.073.

(2) Lee, Y. M.; Lee, G.; Zoh, K. D. Benzophenone-3 degradation via UV/H2O2 and UV/persulfate reactions. *JOURNAL OF HAZARDOUS MATERIALS* **2021**, *403*. DOI: 10.1016/j.jhazmat.2020.123591.

(3) Olexová, A.; Mrákavová, M.; Melichercík, M.; Treindl, L. The autocatalytic oxidation of iodine with hydrogen peroxide in relation to the Bray-Liebhafsky oscillatory reaction. *COLLECTION OF CZECHOSLOVAK CHEMICAL COMMUNICATIONS* **2006**, *71* (1), 91-106. DOI: 10.1135/cccc20060091.

(4) Kiwi, J.; Lopez, A.; Nadtochenko, V. Mechanism and kinetics of the OH-radical intervention during fenton oxidation in the presence of a significant amount of radical scavenger (Cl-). *ENVIRONMENTAL SCIENCE & TECHNOLOGY* **2000**, *34* (11), 2162-2168. DOI: 10.1021/es991406i.

(5) De Laat, J.; Le, G. T.; Legube, B. A comparative study of the effects of chloride, sulfate and nitrate ions on the rates of decomposition of H2O2 and organic compounds by Fe(II)/H2O2 and Fe(III)/H2O2. *CHEMOSPHERE* **2004**, *55* (5), 715-723. DOI: 10.1016/j.chemosphere.2003.11.021.

(6) Zhou, P.; Zhang, J.; Zhang, Y. L.; Liang, J.; Liu, Y.; Liu, B.; Zhang, W. Activation of hydrogen peroxide during the corrosion of nanoscale zero valent copper in acidic solution. *JOURNAL OF MOLECULAR CATALYSIS A-CHEMICAL* **2016**, *424*, 115-120. DOI: 10.1016/j.molcata.2016.08.022.

(7) Peng, J. B.; Shi, H. H.; Li, J. H.; Wang, L. H.; Wang, Z. Y.; Gao, S. X. Bicarbonate enhanced removal of triclosan by copper(II) catalyzed Fenton-like reaction in aqueous solution. *CHEMICAL ENGINEERING JOURNAL* **2016**, *306*, 484-491. DOI: 10.1016/j.cej.2016.07.088.

(8) Perez-Benito, J. F. Copper(II)-catalyzed decomposition of hydrogen peroxide: Catalyst activation by halide ions. *MONATSHEFTE FUR CHEMIE* **2001**, *132* (12), 1477-1492. DOI: 10.1007/s007060170004.

(9) Chen, Z. H.; Li, J. Y.; Koh, K. Y.; Du, Z. R.; Ong, C. N.; Chen, J. P. Kinetics and Mechanism Investigation of Selective Arsenite Oxidation by Reactive Iodine Species in Hydrogen Peroxide and Iodide (H2O2/I-) System. *ACS ES&T WATER* **2021**, *1* (6), 1515-1523. DOI: 10.1021/acsestwater.1c00062.

(10) Dutta, K.; Bhattacharjee, S.; Chaudhuri, B.; Mukhopadhyay, S. Oxidative Degradation of Malachite Green by Fenton Generated Hydroxyl Radicals in Aqueous Acidic Media. *Journal of Environmental Science and Health, Part A* **2003**, *38* (7), 1311-1326. DOI: 10.1081/ese-120021128.

(11) Aguiar, A.; Ferraz, A. Fe3+ and Cu2+-reduction by phenol derivatives associated with Azure B degradation in Fenton-like reactions. *CHEMOSPHERE* **2007**, *66* (5), 947-954. DOI: 10.1016/j.chemosphere.2006.05.067.

(12) Wu, J. X.; Wang, B.; Blaney, L.; Peng, G. L.; Chen, P.; Cui, Y. Z.; Deng, S. B.; Wang, Y. J.; Huang, J.; Yu, G. Degradation of sulfamethazine by persulfate activated with organo-montmorillonite supported nano-zero valent iron. *CHEMICAL ENGINEERING JOURNAL* **2019**, *361*, 99-108. DOI: 10.1016/j.cej.2018.12.024.

(13) Bremner, D. H.; Burgess, A. E.; Houllemare, D.; Namkung, K. C. Phenol degradation using hydroxyl radicals generated from zero-valent iron and hydrogen peroxide. *APPLIED CATALYSIS B-ENVIRONMENTAL* **2006**, *63* (1-2), 15-19. DOI: 10.1016/j.apcatb.2005.09.005.

(14) Chen, Z. H.; Song, X. J.; Zhang, S. J.; Wu, B. D.; Zhang, G. Y.; Pan, B. C. Acetylacetone as an efficient electron shuttle for concerted redox conversion of arsenite and nitrate in the opposite direction. *WATER RESEARCH* **2017**, *124*, 331-340. DOI: 10.1016/j.watres.2017.07.071.

(15) King, D. W.; Farlow, R. Role of carbonate speciation on the oxidation of Fe(II) by H2O2. *MARINE CHEMISTRY* **2000**, *70* (1-3), 201-209. DOI: 10.1016/S0304-4203(00)00026-8.

(16) Le Truong, G.; De Laat, J.; Legube, B. Effects of chloride and sulfate on the rate of oxidation of ferrous ion by H2O2. *WATER RESEARCH* **2004**, *38* (9), 2384-2394. DOI: 10.1016/j.watres.2004.01.033.

(17) Lu, M. C.; Chen, J. N.; Chang, C. P. Effect of inorganic ions on the oxidation of dichlorvos insecticide with Fenton's reagent. *CHEMOSPHERE* **1997**, *35* (10), 2285-2293. DOI: 10.1016/S0045-6535(97)00307-X.

(18) Yuan, R.; Ramjaun, S. N.; Wang, Z.; Liu, J. Concentration profiles of chlorine radicals and their significances in •OH-induced dye degradation: Kinetic modeling and reaction pathways. *Chemical Engineering Journal* **2012**, *209*, 38-45. DOI: 10.1016/j.cej.2012.07.127.

(19) Li, Y. Y.; Song, W. H.; Fu, W. J.; Tsang, D. C. W.; Yang, X. The roles of halides in the acetaminophen degradation by UV/H2O2 treatment: Kinetics, mechanisms, and products analysis. *CHEMICAL ENGINEERING JOURNAL* **2015**, *271*, 214-222. DOI: 10.1016/j.cej.2015.02.090.

(20) Grebel, J. E.; Pignatello, J. J.; Mitch, W. A. Effect of Halide Ions and Carbonates on Organic Contaminant Degradation by Hydroxyl Radical-Based Advanced Oxidation Processes in Saline Waters. *ENVIRONMENTAL SCIENCE & TECHNOLOGY* **2010**, *44* (17), 6822-6828. DOI: 10.1021/es1010225.

(21) Jayson, G. G.; Swallow, A. J.; Parsons, B. J. OXIDATION OF FERROUS IONS BY HYDROXYL RADICALS. *JOURNAL OF THE CHEMICAL SOCIETY-FARADAY TRANSACTIONS I* **1972**, *68* (11), 2053-&. DOI: 10.1039/f19726802053.

(22) Fang, C. L.; Lou, X. Y.; Huang, Y.; Feng, M.; Wang, Z. H.; Liu, J. S. Monochlorophenols degradation by UV/persulfate is immune to the presence of chloride: Illusion or reality? *CHEMICAL ENGINEERING JOURNAL* **2017**, *323*, 124-133. DOI: 10.1016/j.cej.2017.04.094.

(23) Yang, Y. Recent advances in the electrochemical oxidation water treatment: Spotlight on byproduct control. *FRONTIERS OF ENVIRONMENTAL SCIENCE & ENGINEERING* **2020**, *14* (5). DOI: 10.1007/s11783-020-1264-7.

(24) Dutta, K.; Bhattacharjee, S.; Chaudhuri, B.; Mukhopadhyay, S. Oxidative degradation of malachite green by Fenton generated hydroxyl radicals in aqueous acidic media. *JOURNAL OF ENVIRONMENTAL SCIENCE AND HEALTH PART A-TOXIC/HAZARDOUS SUBSTANCES & ENVIRONMENTAL ENGINEERING* **2003**, *38* (7), 1311-1326. DOI: 10.1081/ESE-120021128.

(25) Lee, Y. M.; Lee, G.; Kim, T.; Zoh, K. D. Degradation of benzophenone-8 in UV/oxidation processes: Comparison of UV/H2O2, UV/persulfate, UV/chlorine processes. *JOURNAL OF ENVIRONMENTAL CHEMICAL ENGINEERING* **2024**, *12* (1). DOI: 10.1016/j.jece.2023.111623.

(26) Yuan, R. X.; Ramjaun, S. N.; Wang, Z. H.; Liu, J. S. Concentration profiles of chlorine radicals and their significances in •OH-induced dye degradation: Kinetic modeling and reaction pathways. *CHEMICAL ENGINEERING JOURNAL* **2012**, *209*, 38-45. DOI: 10.1016/j.cej.2012.07.127.

(27) Micó, M. M.; Bacardit, J.; Malfeito, J.; Sans, C. Enhancement of pesticide photo-Fenton oxidation at high salinities. *APPLIED CATALYSIS B-ENVIRONMENTAL* **2013**, *132*, 162-169. DOI: 10.1016/j.apcatb.2012.11.016.

(28) Kamranifar, M.; Ghanbari, S.; Fatehizadeh, A.; Taheri, E.; Azizollahi, N.; Momeni, Z.; Khiadani, M.; Ebrahimpour, K.; Ganachari, S.; Aminabhavi, T. M. Unique effect of bromide ion on intensification of advanced oxidation processes for pollutants removal: A systematic review. *ENVIRONMENTAL POLLUTION* **2024**, *354*. DOI: 10.1016/j.envpol.2024.124136.

(29) Shu, Z.; Wang, J. L.; Liu, H.; Liu, C. G. Improvement of bromide ions on the degradation of sulfamerazine by horseradish peroxidase-H2O2 system and its interaction mechanisms. *CHEMICAL ENGINEERING JOURNAL* **2022**, *428*. DOI: 10.1016/j.cej.2021.131132.

(30) Sieira, B. J.; Montes, R.; Touffet, A.; Rodil, R.; Cela, R.; Gallard, H.; Quintana, J. B. Chlorination and bromination of 1,3-diphenylguanidine and 1,3-di-o-tolylguanidine: Kinetics, transformation products and toxicity assessment. *JOURNAL OF HAZARDOUS MATERIALS* **2020**, *385*. DOI: 10.1016/j.jhazmat.2019.121590.

(31) Zhao, G. D.; Xue, K.; Dong, H. L.; Lou, S. Y.; Zhang, X. H.; Cao, Z.; Yi, B. Q.; Tong, R. B. Bromide as Noninnocent Ligand to Iron Tames Fenton Chemistry for Chemoselective Nondegrading Oxidation. *ANGEWANDTE CHEMIE-INTERNATIONAL EDITION* **2025**. DOI: 10.1002/anie.202505907.

(32) Xing, G. W.; Pham, A. N.; Miller, C. J.; Waite, T. D. pH-dependence of production of oxidants (Cu( III) and/or HO•) by copper-catalyzed decomposition of hydrogen peroxide under conditions typical of natural saline waters. *GEOCHIMICA ET COSMOCHIMICA ACTA* **2018**, *232*, 30-47. DOI: 10.1016/j.gca.2018.04.016.

(33) Von Gunten, U.; Oliveras, Y. Advanced oxidation of bromide-containing waters: Bromate formation mechanisms. *ENVIRONMENTAL SCIENCE & TECHNOLOGY* **1998**, *32* (1), 63-70. DOI: 10.1021/es970477j.

(34) Lu, J.; Wu, J.; Ji, Y.; Kong, D. Transformation of bromide in thermo activated persulfate oxidation processes. *Water Research* **2015**, *78*, 1-8. DOI: 10.1016/j.watres.2015.03.028.

(35) Wang, A. N.; Shi, L. X.; Wei, W. R.; Yang, X.; Fang, J. Y. Bromide significantly promoted the abatement of micropollutants by peroxymonosulfate: Roles of HOBr and Br2. *CHEMICAL ENGINEERING JOURNAL* **2022**, *443*. DOI: 10.1016/j.cej.2022.136492.

(36) Pan, Y.; Zhang, X. R. Four Groups of New Aromatic Halogenated Disinfection Byproducts: Effect of Bromide Concentration on Their Formation and Speciation in Chlorinated Drinking Water. *ENVIRONMENTAL SCIENCE & TECHNOLOGY* **2013**, *47* (3), 1265-1273. DOI: 10.1021/es303729n.

(37) Yang, Y.; Pignatello, J. J.; Ma, J.; Mitch, W. A. Comparison of Halide Impacts on the Efficiency of Contaminant Degradation by Sulfate and Hydroxyl Radical-Based Advanced Oxidation Processes (AOPs). *ENVIRONMENTAL SCIENCE & TECHNOLOGY* **2014**, *48* (4), 2344-2351. DOI: 10.1021/es404118q.

(38) Criquet, J.; Allard, S.; Salhi, E.; Joll, C. A.; Heitz, A.; von Gunten, U. Iodate and Iodo-Trihalomethane Formation during Chlorination of Iodide-Containing Waters: Role of Bromide. *Environmental Science & Technology* **2012**, *46* (13), 7350-7357. DOI: 10.1021/es301301g.

(39) Sivey, J. D.; Arey, J. S.; Tentscher, P. R.; Roberts, A. L. Reactivity of BrCl, Br2, BrOCl, Br2O, and HOBr Toward Dimethenamid in Solutions of Bromide plus Aqueous Free Chlorine. *ENVIRONMENTAL SCIENCE & TECHNOLOGY* **2013**, *47* (3), 1330-1338. DOI: 10.1021/es302730h.

(40) Zhou, Y.; Jiang, J.; Gao, Y.; Pang, S.-Y.; Ma, J.; Duan, J.; Guo, Q.; Li, J.; Yang, Y. Oxidation of steroid estrogens by peroxymonosulfate (PMS) and effect of bromide and chloride ions: Kinetics, products, and modeling. *Water Research* **2018**, *138*, 56-66. DOI: 10.1016/j.watres.2018.03.045.

(41) Zhao, X.; Ma, J.; von Gunten, U. Reactions of hypoiodous acid with model compounds and the formation of iodoform in absence/presence of permanganate. *Water Research* **2017**, *119*, 126-135. DOI: 10.1016/j.watres.2017.04.033.

(42) Momeni, Z.; Modalaliyan, F.; Fatehizadeh, A.; Ghanbari, S.; Ebrahimi, A.; Khiadani, M.; Taheri, E.; Rezakazemi, M. Harnessing bromide ions to boost peroxymonosulfate for reactive yellow 145 dye degradation. *ENVIRONMENTAL RESEARCH* **2024**, *255*. DOI: 10.1016/j.envres.2024.119111.

(43) Liu, X.; Xu, P.; Zhu, P. F.; Yang, Z. Y.; Wu, R. X.; Hou, B. L. Rapid oxidation of acetaminophen with zero-valent copper induced hydrogen peroxide process in presence of ferric ion and chloride ion. *CHEMICAL ENGINEERING JOURNAL* **2023**, *470*. DOI: 10.1016/j.cej.2023.144202.

(44) Brodfuehrer, S. H.; Wahman, D. G.; Alsulaili, A.; Speitel, G. E.; Katz, L. E. Role of Carbonate Species on General Acid Catalysis of Bromide Oxidation by Hypochlorous Acid (HOCl) and Oxidation by Molecular Chlorine (Cl2). *ENVIRONMENTAL SCIENCE & TECHNOLOGY* **2020**, *54* (24), 16186-16194. DOI: 10.1021/acs.est.0c04563.

(45) Hua, G. H.; Reckhow, D. A.; Kim, J. Effect of bromide and iodide ions on the formation and speciation of disinfection byproducts during chlorination. *ENVIRONMENTAL SCIENCE & TECHNOLOGY* **2006**, *40* (9), 3050-3056. DOI: 10.1021/es0519278.

(46) Wang, Z. R.; Fu, Y. S.; Peng, Y. L.; Wang, S. X.; Liu, Y. Q. HCO3-/CO32- enhanced degradation of diclofenac by Cu(II)-activated peracetic acid: Efficiency and mechanism. *SEPARATION AND PURIFICATION TECHNOLOGY* **2021**, *277*. DOI: 10.1016/j.seppur.2021.119434.

(47) Milenkovic, M. C.; Stanisavljev, D. R. Role of Free Radicals in Modeling the Iodide Peroxide Reaction Mechanism. *JOURNAL OF PHYSICAL CHEMISTRY A* **2012**, *116* (23), 5541-5548. DOI: 10.1021/jp303732u.

(48) Liebhafsky, H. A. The catalytic decomposition of hydrogen peroxide by the iodine-iodide couple at 25°. *JOURNAL OF THE AMERICAN CHEMICAL SOCIETY* **1932**, *54*, 1792-1806. DOI: 10.1021/ja01344a011.

(49) Schmitz, G. Iodine oxidation by hydrogen peroxide in acidic solutions, Bray-Liebhafsky reaction and other related reactions. *PHYSICAL CHEMISTRY CHEMICAL PHYSICS* **2010**, *12* (25), 6605-6615. DOI: 10.1039/b927432d.

(50) Neta, P.; Grodkowski, J.; Ross, A. B. Rate constants for reactions of aliphatic carbon-centered radicals in aqueous solution. *JOURNAL OF PHYSICAL AND CHEMICAL REFERENCE DATA* **1996**, *25* (3), 709-1050. DOI: 10.1063/1.555978.

(51) Schwarz, H. A.; Bielski, B. H. J. REACTIONS OF HO2 AND O2- WITH IODINE AND BROMINE AND THE I2- AND I ATOM REDUCTION POTENTIALS. *JOURNAL OF PHYSICAL CHEMISTRY* **1986**, *90* (7), 1445-1448. DOI: 10.1021/j100398a045.

(52) Wang, J. L.; Shu, Z.; Chen, Z. N.; Su, J. X.; Liu, C. G. Iodide ions enhancing sulfamerazine degradation by horseradish peroxidase/H2O2: Degradation products, degradation mechanism and toxicity assessment. *JOURNAL OF CLEANER PRODUCTION* **2022**, *337*. DOI: 10.1016/j.jclepro.2022.130489.

(53) Furrow, S. REACTIONS OF IODINE INTERMEDIATES IN IODATE HYDROGEN-PEROXIDE OSCILLATORS. *JOURNAL OF PHYSICAL CHEMISTRY* **1987**, *91* (8), 2129-2135. DOI: 10.1021/j100292a031.

(54) Bednar, A. J.; Garbarino, J. R.; Ranville, J. F.; Wildeman, T. R. Preserving the distribution of inorganic arsenic species in groundwater and acid mine drainage samples. *ENVIRONMENTAL SCIENCE & TECHNOLOGY* **2002**, *36* (10), 2213-2218. DOI: 10.1021/es0157651.

(55) Shin, J.; Lee, Y.; von Gunten, U. Kinetics of the reaction between hydrogen peroxide and aqueous iodine: Implications for technical and natural aquatic systems. *WATER RESEARCH* **2020**, *179*. DOI: 10.1016/j.watres.2020.115852.

(56) Zhou, Y.; Li, J.; Jiang, J.; Gao, Y.; Yang, Y.; Pang, S. Y.; Ma, J.; Guan, C. T.; Wang, L. H. Iodine Atom or Hypoiodous Acid? Comment on "Rapid Selective Circumneutral Degradation of Phenolic Pollutants Using Peroxymonosulfate lodide Metal-Free Oxidation: Role of Iodine Atoms". *ENVIRONMENTAL SCIENCE & TECHNOLOGY* **2017**, *51* (16), 9410-9411. DOI: 10.1021/acs.est.7b02888.

(57) Ying, L. W.; Liu, Y.; Dong, W. B.; Yuan, H. X.; Ma, L. M. Effect of bromide ions on the UV/H2O2 oxidation of alanine in aqueous solutions. *CHEMICAL ENGINEERING JOURNAL* **2016**, *285*, 172-179. DOI: 10.1016/j.cej.2015.10.018.

(58) Wu, Y.; Wang, Y.; Pan, T.; Yang, X. Oxidation of tetrabromobisphenol A (TBBPA) by peroxymonosulfate: The role of in-situ formed HOBr. *WATER RESEARCH* **2020**, *169*. DOI: 10.1016/j.watres.2019.115202.

(59) Li, J.; Jiang, J.; Zhou, Y.; Pang, S. Y.; Gao, Y.; Jiang, C. C.; Ma, J.; Jin, Y. X.; Yang, Y.; Liu, G. Q.; et al. Kinetics of Oxidation of Iodide (I-) and Hypoiodous Acid (HOI) by Peroxymonosulfate (PMS) and Formation of Iodinated Products in the PMS/I-/NOM System. *ENVIRONMENTAL SCIENCE & TECHNOLOGY LETTERS* **2017**, *4* (2), 76-82. DOI: 10.1021/acs.estlett.6b00471.

(60) Gallard, H.; Von Gunten, U. Chlorination of phenols: Kinetics and formation of chloroform. *ENVIRONMENTAL SCIENCE & TECHNOLOGY* **2002**, *36* (5), 884-890. DOI: 10.1021/es010076a.

(61) Heeb, M. B.; Criquet, J.; Zimmermann-Steffens, S. G.; von Gunten, U. Oxidative treatment of bromide-containing waters: Formation of bromine and its reactions with inorganic and organic compounds - A critical review. *WATER RESEARCH* **2014**, *48*, 15-42. DOI: 10.1016/j.watres.2013.08.030.

(62) Fang, C. L.; Wang, Z. H.; Feng, M.; Huang, Y.; Yang, F.; Liu, J. S. Trace bromide ion impurity leads to formation of chlorobromoaromatic by-products in peroxymonosulfate-based oxidation of chlorophenols. *CHEMOSPHERE* **2017**, *182*, 624-629. DOI: 10.1016/j.chemosphere.2017.05.065.

(63) von Gunten, U. Ozonation of drinking water: Part II. Disinfection and by-product formation in presence of bromide, iodide or chlorine. *WATER RESEARCH* **2003**, *37* (7), 1469-1487. DOI: 10.1016/S0043-1354(02)00458-X.

(64) Lee, H.; Seong, J.; Lee, K. M.; Kim, H. H.; Choi, J.; Kim, J. H.; Lee, C. Chloride-enhanced oxidation of organic contaminants by Cu(II)-catalyzed Fenton-like reaction at neutral pH. *JOURNAL OF HAZARDOUS MATERIALS* **2018**, *344*, 1174-1180. DOI: 10.1016/j.jhazmat.2017.10.020.

(65) Lu, J. H.; Wu, J. W.; Ji, Y. F.; Kong, D. Y. Transformation of bromide in thermo activated persulfate oxidation processes. *WATER RESEARCH* **2015**, *78*, 1-8. DOI: 10.1016/j.watres.2015.03.028.

(66) Zhang, M.; Lin, K. D. Unintended polyhalogenated carbazole production during advanced oxidation of coking wastewater. *JOURNAL OF HAZARDOUS MATERIALS* **2024**, *473*. DOI: 10.1016/j.jhazmat.2024.134649.

(67) Xiao, J. Y.; Li, Y. J.; Dong, H. R.; Pang, Z. J.; Zhao, M. X.; Dong, J.; Huang, D. F.; Li, L. Iodide ion as an electron shuttle to significantly accelerate the elimination of sulfamethazine in the Fenton-like system under neutral condition. *APPLIED CATALYSIS B-ENVIRONMENT AND ENERGY* **2024**, *344*. DOI: 10.1016/j.apcatb.2023.123610.

(68) Feng, Y.; Shih, K. Response to Comment on "Rapid Selective Circumneutral Degradation of Phenolic Pollutants Using Peroxymonosulfate-Iodide Metal-Free Oxidation: Role of Iodine Atoms". *ENVIRONMENTAL SCIENCE & TECHNOLOGY* **2017**, *51* (16), 9412-9413. DOI: 10.1021/acs.est.7b03417.
